# Supplementary material for: Theoretical investigation on isomerization and decomposition reactions of pentanol radicals–part II: linear pentanol isomers
Source: Royal Society of Chemistry journal article supplement (doi:10.1039/d4cp00903g), 2024-01-01
Supplement: d4cp00903g2.pdf [file d4cp00903g2.pdf]

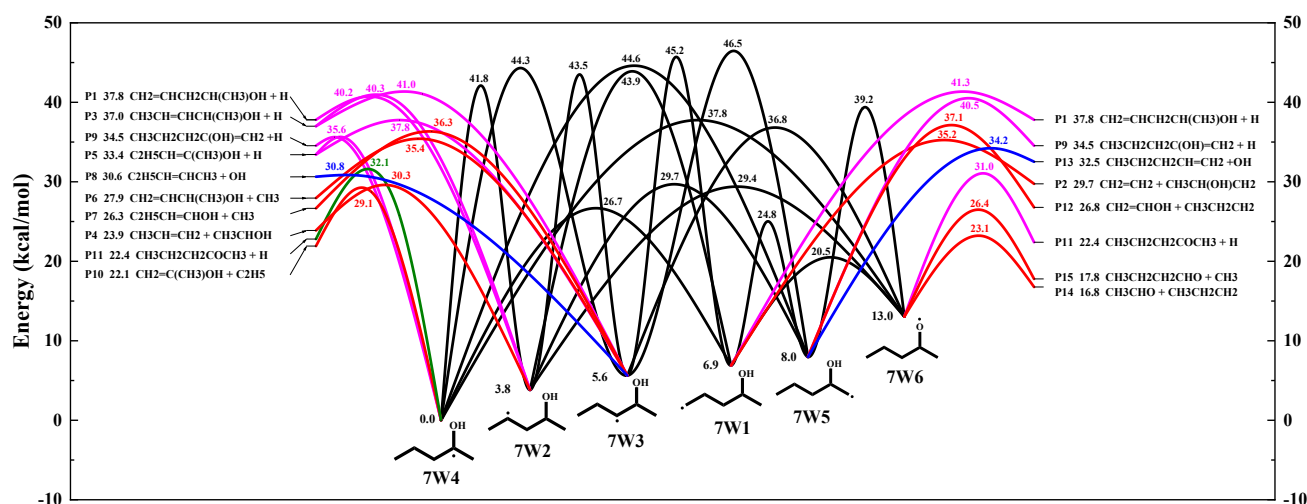

**Fig. 2.** The complete potential energy surface (including ZPE) accessed upon isomerization and decomposition of 2-pentanol radicals.

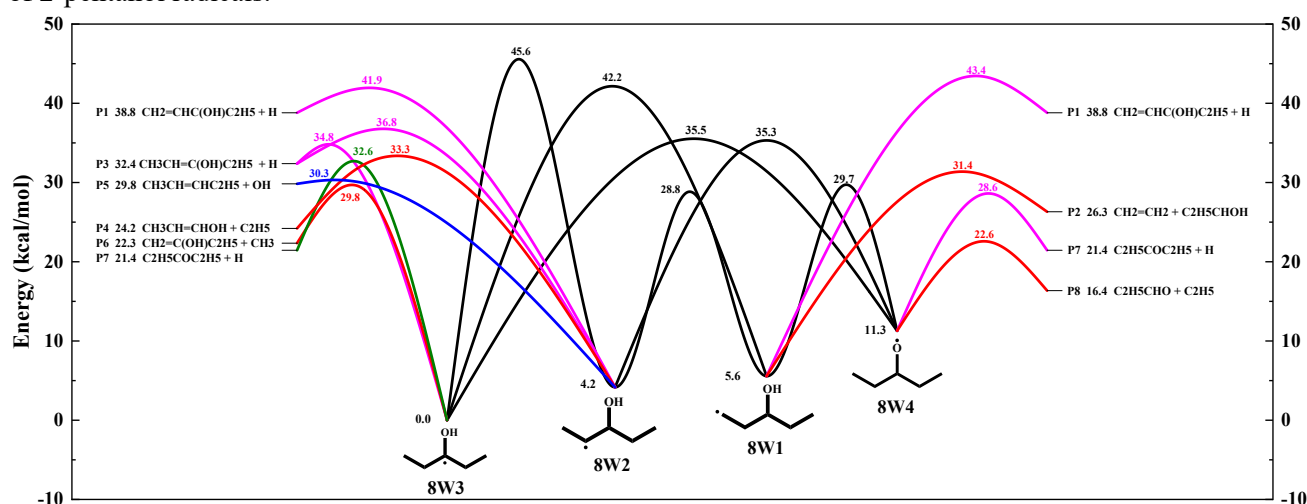

**Fig. 3.** The complete potential energy surface (including ZPE) accessed upon isomerization and decomposition of 3-pentanol radicals.

## T1 diagnostic value

**Table 1.** T1 diagnostic value of all species related to important reaction channels.

| Species                                               | T1 value | Transition state of reactions                                                            | T1 value |
|-------------------------------------------------------|----------|------------------------------------------------------------------------------------------|----------|
| 6W1                                                   | 0.0108   | 6W5→6W1                                                                                  | 0.0133   |
| 6W2                                                   | 0.0114   | 6W5→6W2                                                                                  | 0.0130   |
| 6W3                                                   | 0.0113   | 6W2→6W6                                                                                  | 0.0240   |
| 6W4                                                   | 0.0114   | 6W3→6W6                                                                                  | 0.0253   |
| 6W5                                                   | 0.0136   | 6W4→6W1                                                                                  | 0.0104   |
| 6W6                                                   | 0.0157   | 6W1→6W6                                                                                  | 0.0226   |
| CH <sub>2</sub> =CH <sub>2</sub>                      | 0.0107   | 6W1→CH <sub>2</sub> =CH <sub>2</sub> +ĊH <sub>2</sub> CH <sub>2</sub> CH <sub>2</sub> OH | 0.0207   |
| ĊH <sub>2</sub> CH <sub>2</sub> CH <sub>2</sub> OH    | 0.0108   | 6W2→CH <sub>2</sub> =CHCH <sub>3</sub> +ĊH <sub>2</sub> CH <sub>2</sub> OH               | 0.0204   |
| CH <sub>2</sub> =CHCH <sub>3</sub>                    | 0.0101   | 6W3→CH <sub>2</sub> =CHCH <sub>2</sub> CH <sub>2</sub> OH+ĊH <sub>3</sub>                | 0.0203   |
| ĊH <sub>2</sub> CH <sub>2</sub> OH                    | 0.0114   | 6W3→CH <sub>2</sub> =CHC <sub>2</sub> H <sub>5</sub> +ĊH <sub>2</sub> OH                 | 0.0203   |
| CH <sub>2</sub> =CHCH <sub>2</sub> CH <sub>2</sub> OH | 0.0103   | 6W4→CH <sub>2</sub> =CHCH <sub>2</sub> OH+Ċ <sub>2</sub> H <sub>5</sub>                  | 0.0202   |
| CH <sub>2</sub> =CHC <sub>2</sub> H <sub>5</sub>      | 0.0097   | 6W4→CH <sub>2</sub> =CHCH <sub>2</sub> C <sub>2</sub> H <sub>5</sub> +ĊH                 | 0.0250   |

|                                                           |        |                                                                                                            |        |
|-----------------------------------------------------------|--------|------------------------------------------------------------------------------------------------------------|--------|
| $\dot{\text{C}}\text{H}_2\text{OH}$                       | 0.0187 | $6\text{W}5 \rightarrow \text{CH}_2=\text{CHOH} + \dot{\text{C}}\text{H}_2\text{C}_2\text{H}_5$            | 0.0213 |
| $\text{CH}_2=\text{CHCH}_2\text{OH}$                      | 0.0107 | $6\text{W}6 \rightarrow \text{CH}_2\text{O} + \dot{\text{C}}\text{H}_2\text{CH}_2\text{C}_2\text{H}_5$     | 0.0190 |
| $\dot{\text{C}}_2\text{H}_5$                              | 0.0099 | $6\text{W}6 \rightarrow \text{C}_2\text{H}_5\text{CH}_2\text{CH}_2\text{CHO} + \dot{\text{H}}$             | 0.0164 |
| $\text{CH}_2=\text{CHCH}_2\text{C}_2\text{H}_5$           | 0.0095 |                                                                                                            |        |
| $\dot{\text{O}}\text{H}$                                  | 0.0059 |                                                                                                            |        |
| $\text{CH}_2=\text{CHOH}$                                 | 0.0126 |                                                                                                            |        |
| $\dot{\text{C}}\text{H}_2\text{C}_2\text{H}_5$            | 0.0099 |                                                                                                            |        |
| $\text{CH}_2\text{O}$                                     | 0.0158 |                                                                                                            |        |
| $\dot{\text{C}}\text{H}_2\text{CH}_2\text{C}_2\text{H}_5$ | 0.0099 |                                                                                                            |        |
| $\text{C}_2\text{H}_5\text{CH}_2\text{CH}_2\text{CHO}$    | 0.0123 |                                                                                                            |        |
| <hr/>                                                     |        |                                                                                                            |        |
| 7W1                                                       | 0.0111 | $7\text{W}4 \rightarrow 7\text{W}1$                                                                        | 0.0139 |
| 7W2                                                       | 0.0111 | $7\text{W}2 \rightarrow 7\text{W}5$                                                                        | 0.0106 |
| 7W3                                                       | 0.0117 | $7\text{W}2 \rightarrow 7\text{W}6$                                                                        | 0.0258 |
| 7W4                                                       | 0.0134 | $7\text{W}3 \rightarrow 7\text{W}6$                                                                        | 0.0186 |
| 7W5                                                       | 0.0109 | $7\text{W}1 \rightarrow 7\text{W}5$                                                                        | 0.0109 |
| 7W6                                                       | 0.0175 | $7\text{W}1 \rightarrow 7\text{W}6$                                                                        | 0.0229 |
| $\text{CH}_2=\text{CH}_2$                                 | 0.0107 | $7\text{W}1 \rightarrow \text{CH}_2=\text{CH}_2 + \dot{\text{C}}\text{H}_2\text{CH}(\text{CH}_3)\text{OH}$ | 0.0205 |
| $\dot{\text{C}}\text{H}_2\text{CH}(\text{CH}_3)\text{OH}$ | 0.0114 | $7\text{W}2 \rightarrow \text{CH}_2=\text{CHCH}_3 + \text{CH}_3\dot{\text{C}}\text{HOH}$                   | 0.0205 |
| $\text{CH}_2=\text{CHCH}_3$                               | 0.0101 | $7\text{W}3 \rightarrow \text{CH}_2=\text{CHCH}(\text{CH}_3)\text{OH} + \dot{\text{C}}\text{H}_3$          | 0.0199 |
| $\text{CH}_3\dot{\text{C}}\text{HOH}$                     | 0.0161 | $7\text{W}3 \rightarrow \text{C}_2\text{H}_5\text{CH}=\text{CHOH} + \dot{\text{C}}\text{H}_3$              | 0.0214 |
| $\text{CH}_2=\text{CHCH}(\text{CH}_3)\text{OH}$           | 0.0105 | $7\text{W}3 \rightarrow \text{CH}_3\text{CH}=\text{CHC}_2\text{H}_5 + \dot{\text{O}}\text{H}$              | 0.0262 |
| $\text{C}_2\text{H}_5\text{CH}=\text{CHOH}$               | 0.0113 | $7\text{W}4 \rightarrow \text{CH}_2=\text{C}(\text{CH}_3)\text{OH} + \dot{\text{C}}_2\text{H}_5$           | 0.0209 |
| $\text{CH}_3\text{CH}=\text{CHC}_2\text{H}_5$             | 0.0095 | $7\text{W}4 \rightarrow \text{CH}_3\text{COCH}_2\text{C}_2\text{H}_5 + \dot{\text{H}}$                     | 0.0233 |
| $\text{CH}_2=\text{C}(\text{CH}_3)\text{OH}$              | 0.0115 | $7\text{W}5 \rightarrow \text{CH}_2=\text{CHOH} + \dot{\text{C}}\text{H}_2\text{C}_2\text{H}_5$            | 0.0219 |
| $\dot{\text{C}}_2\text{H}_5$                              | 0.0099 | $7\text{W}5 \rightarrow \text{CH}_2=\text{CHCH}_2\text{C}_2\text{H}_5 + \dot{\text{O}}\text{H}$            | 0.0256 |
| $\text{CH}_3\text{COCH}_2\text{C}_2\text{H}_5$            | 0.0125 | $7\text{W}6 \rightarrow \text{CH}_3\text{CHO} + \dot{\text{C}}\text{H}_2\text{C}_2\text{H}_5$              | 0.0206 |
| $\text{CH}_2=\text{CHOH}$                                 | 0.0126 | $7\text{W}6 \rightarrow \text{C}_2\text{H}_5\text{CH}_2\text{CHO} + \dot{\text{C}}\text{H}_3$              | 0.0202 |
| $\dot{\text{C}}\text{H}_2\text{C}_2\text{H}_5$            | 0.0098 |                                                                                                            |        |
| $\text{CH}_2=\text{CHCH}_2\text{C}_2\text{H}_5$           | 0.0095 |                                                                                                            |        |
| $\dot{\text{O}}\text{H}$                                  | 0.0059 |                                                                                                            |        |
| $\text{CH}_3\text{CHO}$                                   | 0.0147 |                                                                                                            |        |
| $\text{C}_2\text{H}_5\text{CH}_2\text{CHO}$               | 0.0128 |                                                                                                            |        |
| <hr/>                                                     |        |                                                                                                            |        |
| 8W1                                                       | 0.0105 | $8\text{W}3 \rightarrow 8\text{W}4$                                                                        | 0.0123 |
| 8W2                                                       | 0.0113 | $8\text{W}2 \rightarrow 8\text{W}1$                                                                        | 0.0111 |
| 8W3                                                       | 0.0136 | $8\text{W}2 \rightarrow 8\text{W}4$                                                                        | 0.0188 |
| 8W4                                                       | 0.0167 | $8\text{W}1 \rightarrow 8\text{W}4$                                                                        | 0.0243 |
| $\text{CH}_2=\text{CH}_2$                                 | 0.0107 | $8\text{W}1 \rightarrow \text{CH}_2=\text{CH}_2 + \text{C}_2\text{H}_5\dot{\text{C}}\text{HOH}$            | 0.0202 |
| $\text{C}_2\text{H}_5\dot{\text{C}}\text{HOH}$            | 0.0151 | $8\text{W}2 \rightarrow \text{CH}_3\text{CH}=\text{CHOH} + \dot{\text{C}}_2\text{H}_5$                     | 0.0216 |
| $\text{CH}_3\text{CH}=\text{CHOH}$                        | 0.0118 | $8\text{W}2 \rightarrow \text{CH}_3\text{CH}=\text{CHC}_2\text{H}_5 + \dot{\text{O}}\text{H}$              | 0.0256 |
| $\dot{\text{C}}_2\text{H}_5$                              | 0.0099 | $8\text{W}3 \rightarrow \text{CH}_2=\text{C}(\text{OH})\text{C}_2\text{H}_5 + \dot{\text{C}}\text{H}_3$    | 0.0247 |
| $\text{CH}_3\text{CH}=\text{CHC}_2\text{H}_5$             | 0.0094 | $8\text{W}3 \rightarrow \text{C}_2\text{H}_5\text{COC}_2\text{H}_5 + \dot{\text{H}}$                       | 0.0177 |
| $\dot{\text{O}}\text{H}$                                  | 0.0059 | $8\text{W}4 \rightarrow \text{C}_2\text{H}_5\text{CHO} + \dot{\text{C}}_2\text{H}_5$                       | 0.0204 |
| $\text{CH}_2=\text{C}(\text{OH})\text{C}_2\text{H}_5$     | 0.0110 |                                                                                                            |        |
| $\text{C}_2\text{H}_5\text{COC}_2\text{H}_5$              | 0.0136 |                                                                                                            |        |

C<sub>2</sub>H<sub>5</sub>CHO

0.0099

---
